# Supplementary material for: Adipocyte ACLY Facilitates Dietary Carbohydrate Handling to Maintain Metabolic Homeostasis in Females
Source: PubMed Central journal article supplement — Cell Rep. Author manuscript; Available in PMC 2019 Jul 3. (PMC6608748; doi:10.1016/j.celrep.2019.04.112), 2019-05-28
Supplement: NIHMS1530460-supplement-1.pdf [file NIHMS1530460-supplement-1.pdf]

**Cell Reports, Volume 27**

**Supplemental Information**

**Adipocyte ACLY Facilitates Dietary  
Carbohydrate Handling to Maintain  
Metabolic Homeostasis in Females**

**Sully Fernandez, John M. Viola, AnnMarie Torres, Martina Wallace, Sophie Trefely, Steven Zhao, Hayley C. Affronti, Jivani M. Gengatharan, David A. Guertin, Nathaniel W. Snyder, Christian M. Metallo, and Kathryn E. Wellen**

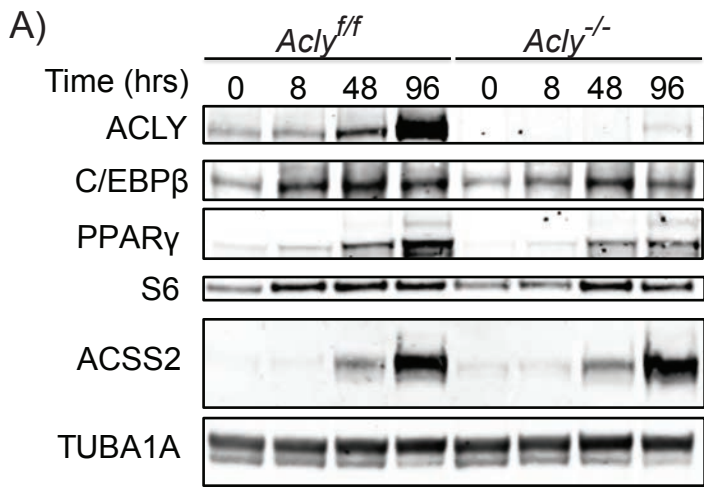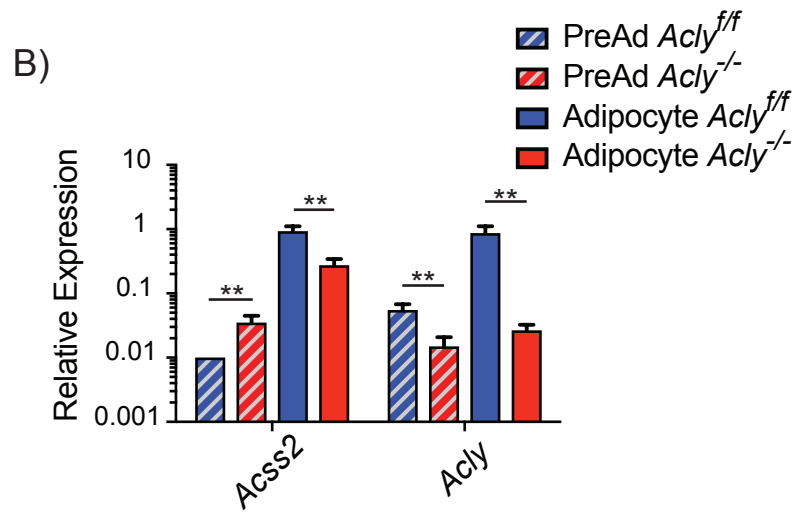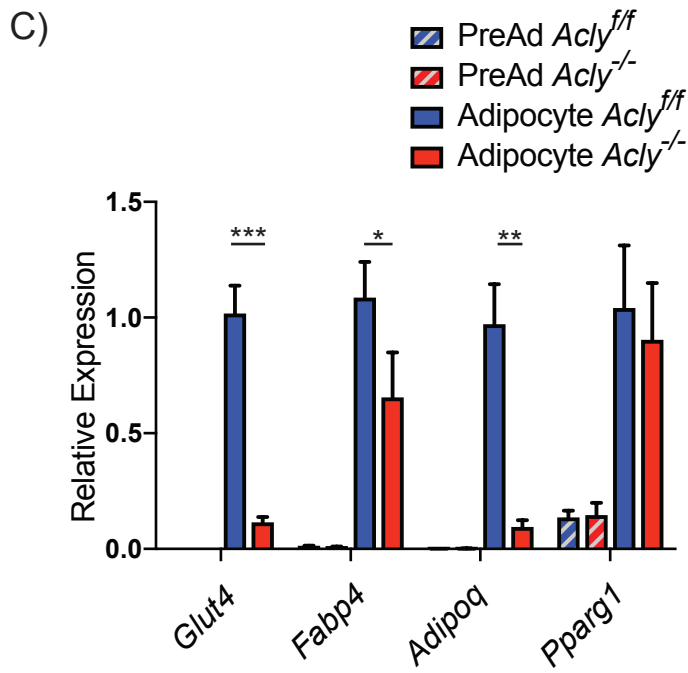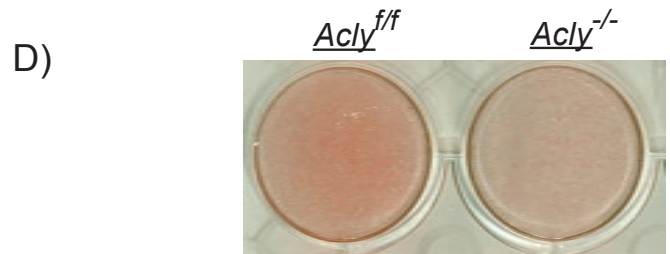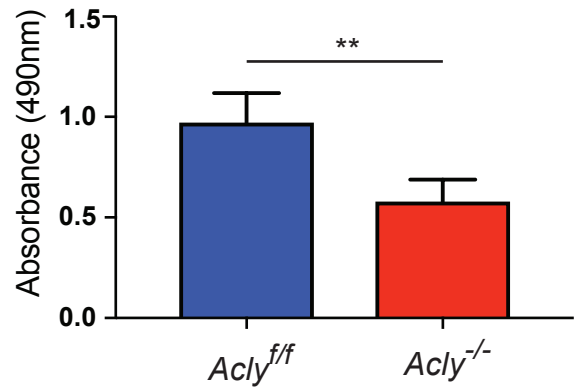

**E)** <sup>13</sup>C Glucose Incorporation into Palmitate

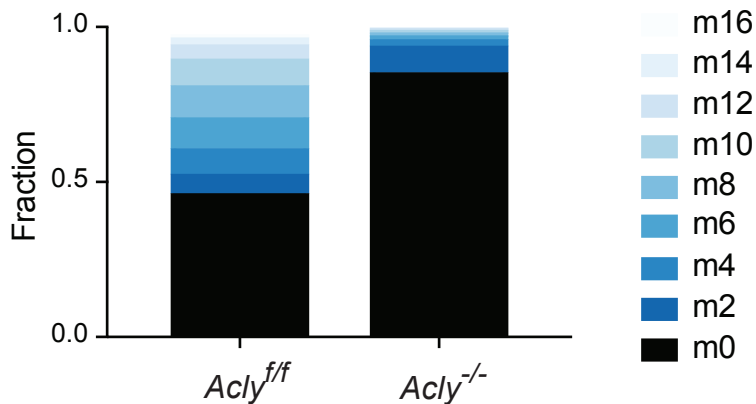

**F)**

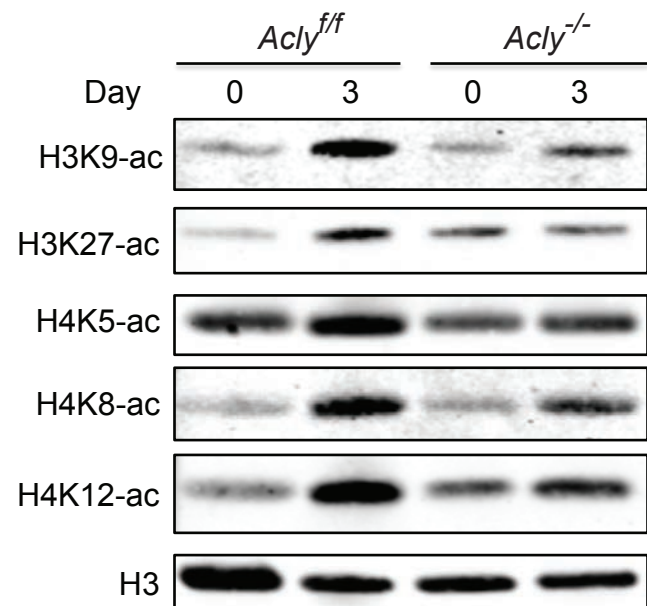

**Figure S1: Generation of a genetic model of *Acly* deficiency in adipocytes. Related to Figure 1.** *Acly* was deleted from immortalized *Acly<sup>fl/fl</sup>* preadipocytes by adenoviral administration of Cre recombinase (denoted *Acly<sup>-/-</sup>* after deletion). *Acly<sup>fl/fl</sup>* and *Acly<sup>-/-</sup>* preadipocytes were induced to differentiate to adipocytes. A) Cells were analyzed by western blot at the indicated time points; B) mRNA expression of *Acly* and *Acss2*; C) mRNA expression of select genes upregulated during differentiation; D) Oil Red O staining and quantitation; E) GC-MS FAME analysis of <sup>13</sup>C-glucose incorporation into palmitate, mean of duplicates shown; F) western blots to evaluate histone acetylation in acid-extracted histones. In all panels, PreAd indicates Day 0 cells prior to induction, Adipocyte denotes cells 4 days after induction of differentiation. All bar graphs represent mean +/- SEM of triplicates; \*, p<0.05; \*\*, p<0.01, \*\*\*, p<0.001.

A)

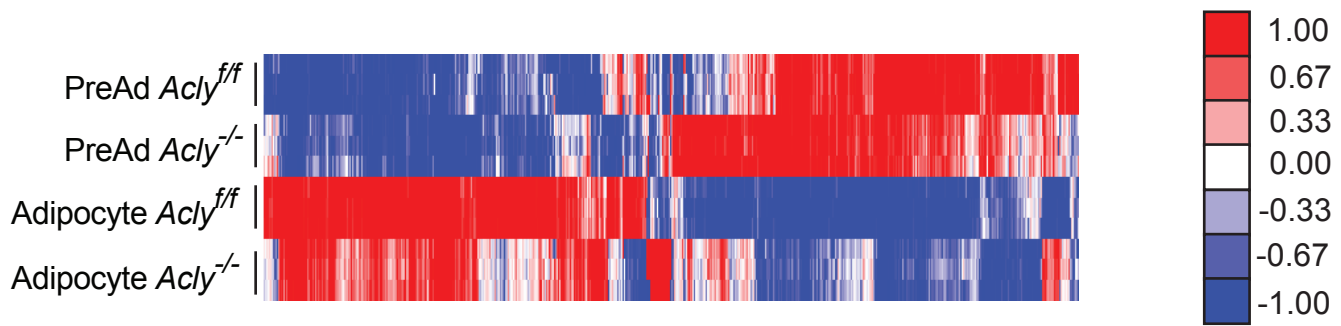

B)

### Gene sets enriched in ACLY KO versus WT adipocytes

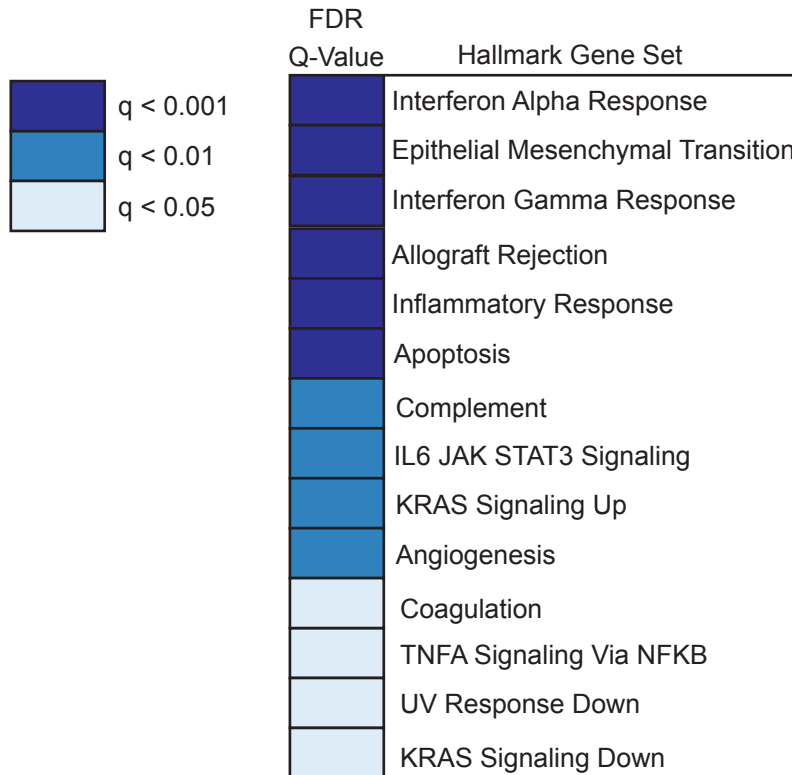

C)

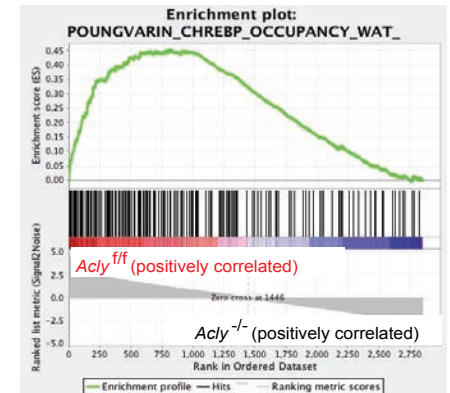

**Figure S2. Inflammatory genes are upregulated in *Acly*<sup>-/-</sup> adipocytes. Related to Figure 1.** A) Heat map clustering of RNA-seq data based on  $q < 0.05$ . B) GSEA analysis of Hallmarks gene sets enriched in KO Ads versus WT Ads. C) GSEA analysis of top 1000 genes occupied by ChREBP in WAT, as defined by (Poungvarin et al., 2015), enriched in WT Ads versus KO Ads.

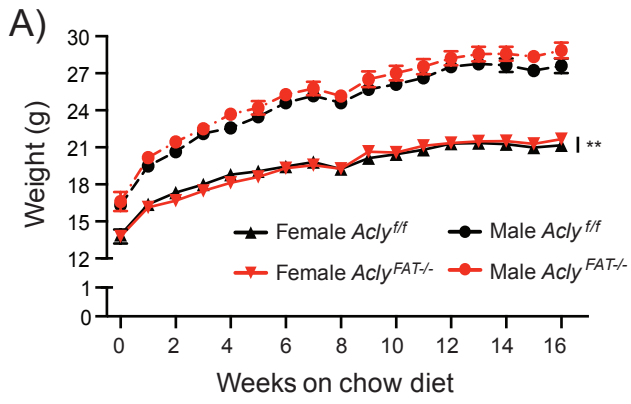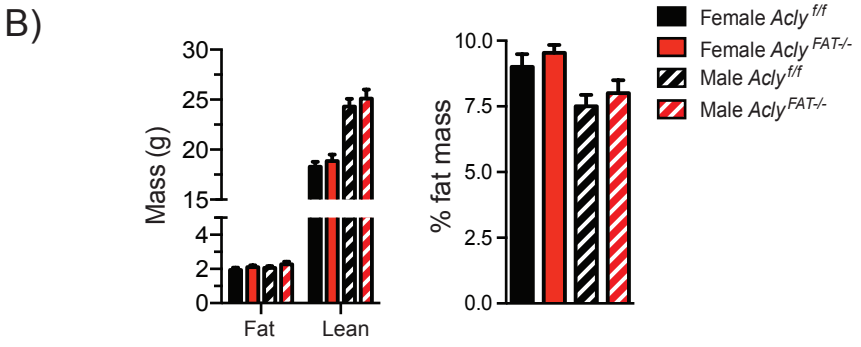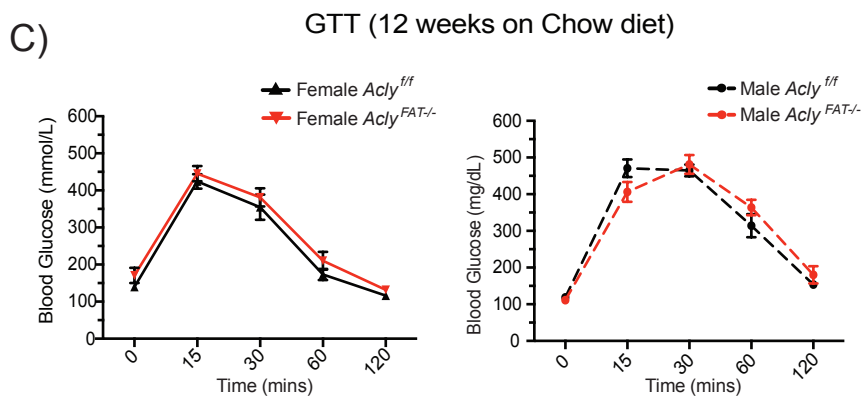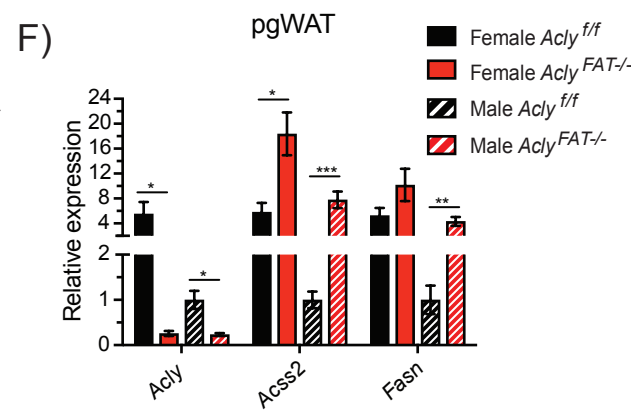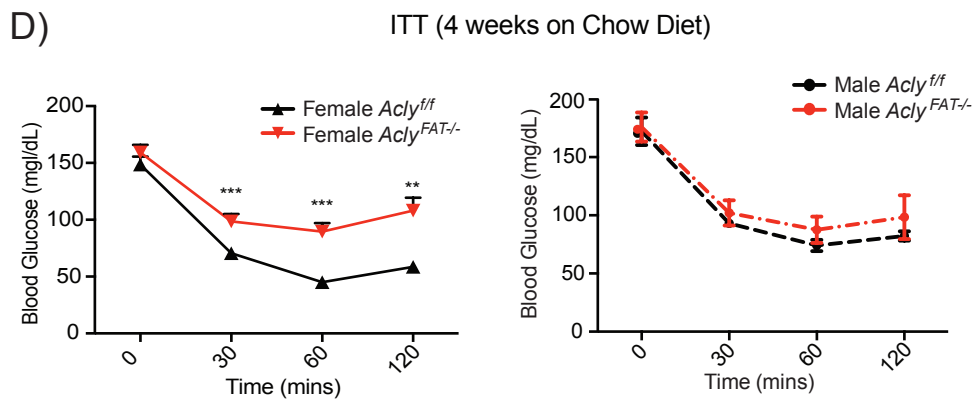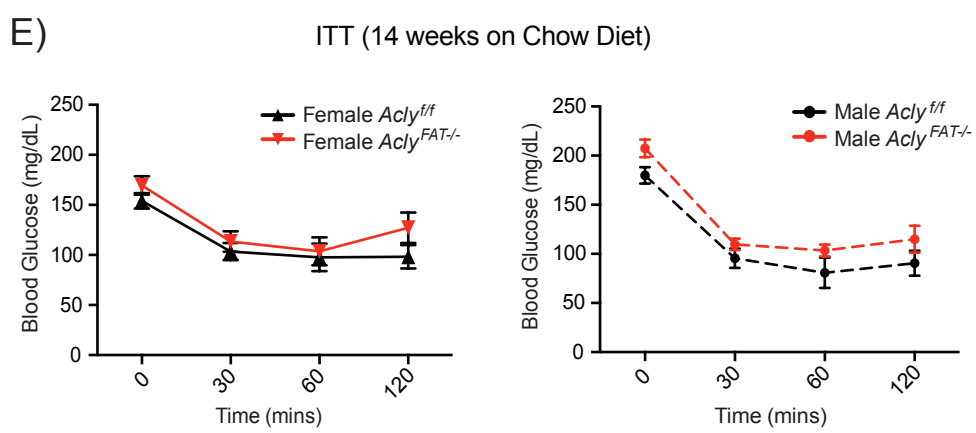

**Figure S3. Adipocyte ACLY deficiency results in insulin resistance in young female chow-fed mice. Related to Figure 3.** Upon weaning, male and female, *Acl<sup>y</sup><sup>fl/fl</sup>* and *Acl<sup>y</sup><sup>FAT-/-</sup>* mice were fed a standard chow diet and monitored for 16 weeks. A) Body weights measured weekly, analyzed by 2-way ANOVA; B) Body composition measured by MRI after 16 weeks on chow diet (age 20 weeks); C) Glucose tolerance tests in males (left panel) and females (right panel) after 12 weeks on diet; D) Insulin tolerance tests in males (left panel) and females (right panel) after 4 weeks on diet; E) Insulin tolerance tests in males (left panel) and females (right panel) after 14 weeks on diet. F) Gene expression in pgWAT. Error bars indicate mean +/- SEM for all panels. 2-tailed t-tests used for analysis, unless ANOVA is indicated for panel. \*, p<0.05; \*\*, p<0.01; \*\*\*, p<0.001.

A)

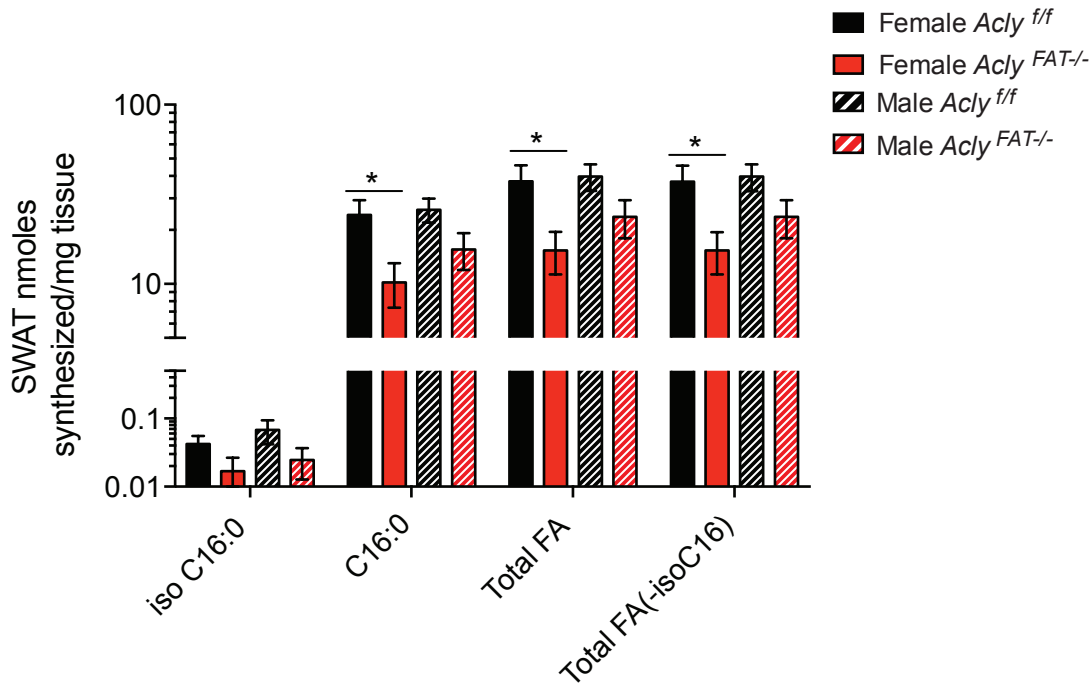

B)

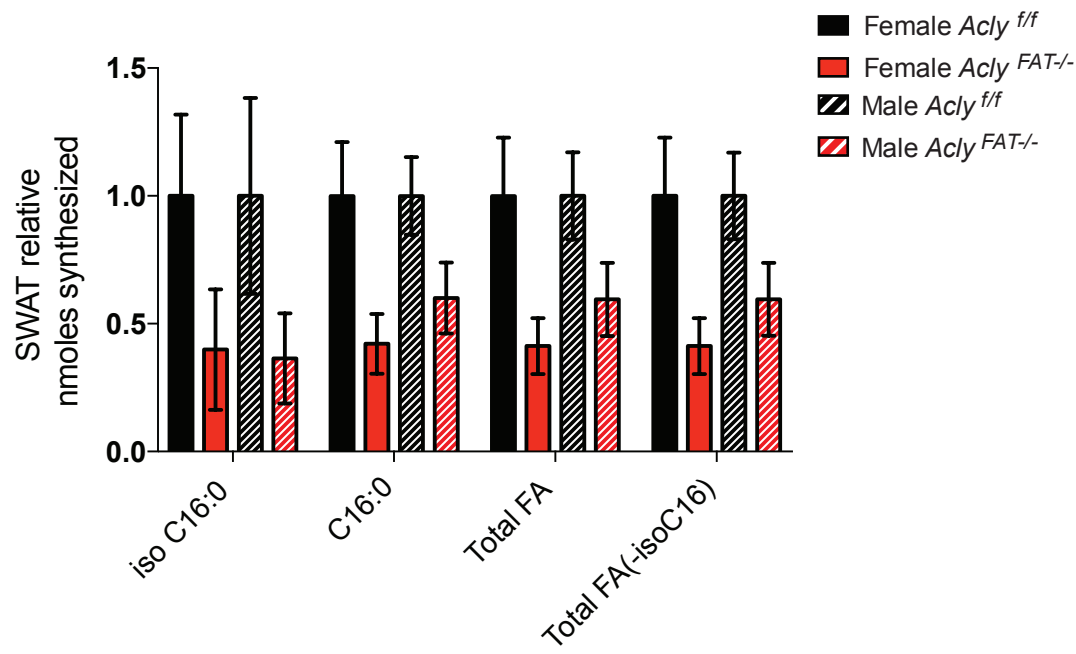

**Figure S4. mmBCFA synthesis is comparably suppressed in the absence of ACLY in males and females. Related to Figure 4.**  
 A, B) Absolute (A) and relative (B) nmoles of indicated fatty acids synthesized per mg tissue. For relative analysis, *Acly*<sup>f/f</sup> mice of each sex is set to 1. Error bars indicate mean +/- SEM. 2-tailed tests used for analysis, \*, p<0.05.

| GENE (SPECIES)                          | PRIMER  | SEQUENCE (5'-3')                | SOURCE             | IDENTIFER      |
|-----------------------------------------|---------|---------------------------------|--------------------|----------------|
| 18S (mouse or human)                    | Forward | AAATCAGTTATGGTTCCTTTGGTC        | Designed In House  | N/A            |
| 18S (mouse or human)                    | Reverse | GCTCTAGAATTACCACAGTTATCCAA      | Designed In House  | N/A            |
| <i>Tnfa</i> (mouse)                     | Forward | CCCTCACACTCAGATCATCTTCT         | Designed In House  | N/A            |
| <i>Tnfa</i> (mouse)                     | Reverse | GCTACGACGTGGGCTACAG             | Designed In House  | N/A            |
| <i>Adipoq</i> (mouse)                   | Forward | GCACTGGCAAGTTCTACTGCAA          | Designed In House  | N/A            |
| <i>Adipoq</i> (mouse)                   | Reverse | GTAGGTGAAGAGAACGGCCTTGT         | Harms Et Al, 2014  | PMID: 24703692 |
| <i>GLUT4</i> (human)                    | Forward | ACCAGAGCAGCCATGGAG              | Designed In House  | N/A            |
| <i>GLUT4</i> (human)                    | Reverse | TTGATGCCTCCGTCCACGAT            | Designed In House  | N/A            |
| <i>CHREBP<math>\beta</math></i> (human) | Forward | AGCGGATTCCAGGTGAGG              | Herman et al, 2012 | PMID: 22466288 |
| <i>CHREBP<math>\beta</math></i> (human) | Reverse | TTGTTCAGGCGGATCTTGTC            | Herman et al, 2012 | PMID: 22466288 |
| <i>ACLY</i> (human)                     | Forward | AAACTGTGGGTCTTTACTCG            | Designed In House  | N/A            |
| <i>ACLY</i> (human)                     | Reverse | GGATGACGATACAGCCCCTG            | Designed In House  | N/A            |
| <i>Acly</i> (mouse)                     | Forward | TTCGTCAAACAGCACTTCC             | Designed In House  | N/A            |
| <i>Acly</i> (mouse)                     | Reverse | ATTTGGCTTCTTGGAGGTG             | Designed In House  | N/A            |
| <i>Acss2</i> (mouse)                    | Forward | GCTTCTTTCCCATTCTTCGGT           | Neess et al, 2011  | PMID: 21106527 |
| <i>Acss2</i> (mouse)                    | Reverse | CCCGGACTCATTGAGGATTG            | Neess et al, 2011  | PMID: 21106527 |
| <i>Glut4</i> (mouse)                    | Forward | GCCCGAAAGAGTCTAAAGC             | Designed In House  | N/A            |
| <i>Glut4</i> (mouse)                    | Reverse | CTTCCGTTTCTCATCCTTCAG           | Designed In House  | N/A            |
| <i>Fabp4</i> (mouse)                    | Forward | ACAAAATGTGTGATGCCTTTGTGGGAAC    | Designed In House  | N/A            |
| <i>Fabp4</i> (mouse)                    | Reverse | TCCGACTGACTATTGTAGTGTGTTGATGCAA | Designed In House  | N/A            |
| <i>Pparg1</i> (mouse)                   | Forward | TGAAAGAAGCGGTGAACCACTG          | Designed In House  | N/A            |
| <i>Pparg1</i> (mouse)                   | Reverse | TGGCATCTCGTGTCAACCATG           | Designed In House  | N/A            |

**Table S2: Primers for qPCR. Related to STAR Methods**
